# Supplementary material for: The Effect of Prickly Ash (Zanthoxylum bungeanum Maxim) on the Taste Perception of Stewed Sheep Tail Fat by LC-QTOF-MS/MS and a Chemometrics Analysis
Source: MDPI journal article supplement (doi:10.3390/foods10112709), 2021-11-05
Supplement: s1 [file s1]

# Effect of prickly ash (*Zanthoxylum bungeanum* Maxim) on the taste perception of stewed sheep tail fat by LC-QTOF-MS/MS and chemometrics analysis

Yan Huang, Dandan Pu, Zhilin Hao, Xiao Yang and Yuyu Zhang\*

<sup>1</sup> Beijing Key Laboratory of Flavor Chemistry, Beijing Technology and Business University, Beijing 100048, China

\* Correspondence: yuyu zhang; zhangyuyu@btbu.edu.cn; Tel.: 15001349082. e-mail@e-mail.com; E-mail addresses of co-authors: huangyan\_916@163.com (Yan Huang), 18518351472@163.com (Dandan Pu), hzl15716324037@163.com (Zhilin Hao), yangxiao@btbu.edu.cn (xiao yang)

**Table S1.** Classification of quantitative compounds and internal standard compounds.

| Internal standard compounds | Quantitative compounds                                                                                                                                                                                                                                                                                                                      |
|-----------------------------|---------------------------------------------------------------------------------------------------------------------------------------------------------------------------------------------------------------------------------------------------------------------------------------------------------------------------------------------|
| Flavone                     | 1-methyladenosine, inosine, ADP, 5'-CMP, guanosine, 5'-GMP, guanosine-3', 5'-cyclic monophosphate, uridine, UMP, adenosine, 5'-AMP, cyclic AMP, (-)-Catechin hydrate, quercetin, rutin, isoquercitrin, isorhamnetin 3-O-neohesperosine, genistein, emodin, daidzein, kaempferol-3-O-rutinoside, hyperoside, cynaroside, astragalin          |
| L-Theanine                  | Glu, Cys, Arg, Leu, Asn, Asp, Val, Leu, succinic acid, fumaric acid, 2-Methylpropanedioic acid, citric acid, taurine, malic acid, Glu-Val, glutathione, acrylamide, betaine, L-carnitine, D(+)-Glucopyranose 6-phosphate, D(+)-Glucose, D-pantothenic acid, N-(Phosphonomethyl)glycine 2-propylamine                                        |
| 1,2-Dichlorobenzene         | 2,6-dihydroxypurine, cytosine, 6-hydroxypurine, guanine, adenine, pyroglutamic acid, 2-Pyrrolidinone, protocatechualdehyde, 3,4-Dihydroxybenzoic acid, benzothiazole, methyl eugenol, trigonelline, bis(2-ethylhexyl) phthalate, dibutyl phthalate, diallyl phthalate, diethyl phthalate, 3-Hydroxy-2-methyl-4H-pyran-4-one, nicotinic acid |
| Methyl palmitate            | linolenic acid, linoleic acid, stearic acid, palmitic acid, arachidonic acid, N-(phenylMethyl)-nerolidol                                                                                                                                                                                                                                    |
| Silibinin                   | D-sucrose, cholic acid, glycocholic acid, ganoderic acid Y, chlorogenic acid, cryptochlorogenic acid, 18 $\beta$ -glycyrrhetic acid, $\beta$ -estradiol, tanshinone IIA, triphenyl phosphate, promethazine, LSD, quinnestrol                                                                                                                |
| gamma-Nonanolactone         | Phe, Tyr, Pro, Trp, His, ferulic acid, caffeic acid, desmedipham, 2-N-heptylfuran, isojasmonone, alpha-bisabolol, methyl jasmonatepure, capsaicin, nicotinamide                                                                                                                                                                             |

**Table S2.** Addition experiment with compounds in different concentration.

| Name                  | Concentration (µg/mL) |         |        |        |        |
|-----------------------|-----------------------|---------|--------|--------|--------|
|                       | 5                     | 2       | 1      | 0.5    | 0.2    |
| Multiple              |                       |         |        |        |        |
| 5'-GMP                | CC1-1                 | CC1-2   | CC1-3  | CC1-4  | CC1-5  |
|                       | 378.25                | 151.30  | 75.65  | 37.83  | 15.13  |
| Malic acid            | CC2-1                 | CC2-2   | CC2-3  | CC2-4  | CC2-5  |
|                       | 58.75                 | 23.50   | 11.75  | 5.88   | 2.35   |
| Inosine               | CC3-1                 | CC3-2   | CC3-3  | CC3-4  | CC3-5  |
|                       | 2889.97               | 1155.99 | 577.99 | 289.00 | 115.60 |
| 5'-AMP                | CC4-1                 | CC4-2   | CC4-3  | CC4-4  | CC4-5  |
|                       | 160.08                | 64.03   | 32.02  | 16.01  | 6.40   |
| Guanosine             | CC5-1                 | CC5-2   | CC5-3  | CC5-4  | CC5-5  |
|                       | 250.27                | 100.11  | 50.05  | 25.03  | 10.01  |
| Fumaric acid          | CC6-1                 | CC6-2   | CC6-3  | CC6-4  | CC6-5  |
|                       | 0.40                  | 0.16    | 0.08   | 0.04   | 0.02   |
| 18β-Glycyrrhetic acid | CC7-1                 | CC7-2   | CC7-3  | CC7-4  | CC7-5  |
|                       | 32.85                 | 13.14   | 6.57   | 3.29   | 1.31   |

**Table S3.** Different types of identified compounds.

| <b>Types</b>       | <b>Compounds</b>                                                                                                                                                                                                                                                                                                                                                                                                                                                                                                                        |
|--------------------|-----------------------------------------------------------------------------------------------------------------------------------------------------------------------------------------------------------------------------------------------------------------------------------------------------------------------------------------------------------------------------------------------------------------------------------------------------------------------------------------------------------------------------------------|
| Amino acids (14)   | Phe, Glu, Cys, pyroglutamic acid, Arg, Tyr, Leu, Pro, Trp, Asn, Asp, Val, Leu, His                                                                                                                                                                                                                                                                                                                                                                                                                                                      |
| Nucleotides (17)   | 1-methyladenosine, 2,6-dihydroxypurine, 5'-CMP, cytosine, inosine, 6-hydroxypurine, ADP, guanosine, 5'-GMP, guanine, guanosine-3', 5'-cyclic monophosphate, uridine, UMP, adenosine, cyclic AMP, 5'-AMP, adenine                                                                                                                                                                                                                                                                                                                        |
| Organic acids (16) | 18 $\beta$ -glycyrrhetic acid, D-pantothenic acid, ferulic acid, cholic acid, fumaric acid, glycocholic acid, succinic acid, 2-methylpropanedioic acid, caffeic acid, ganoderic acid Y, chlorogenic acid, citric acid, taurine, malic acid, nicotinic acid, cryptochlorogenic acid                                                                                                                                                                                                                                                      |
| Sugars (3)         | D(+)-Glucopyranose 6-phosphate, D(+)-Glucose, D-sucrose                                                                                                                                                                                                                                                                                                                                                                                                                                                                                 |
| Peptides (2)       | Glu-Val, glutathione                                                                                                                                                                                                                                                                                                                                                                                                                                                                                                                    |
| Fatty acids (6)    | N-(phenylMethyl)-, arachidonic acid, linolenic acid, linoleic acid, palmitic acid, stearic acid                                                                                                                                                                                                                                                                                                                                                                                                                                         |
| Flavonoids (11)    | (-)-Catechin hydrate, quercetin, genistein, hyperoside, kaempferol-3-O-rutinoside, rutin, cynaroside, isoquercitrin, isorhamnetin 3-O-neohesperosine, astragalin                                                                                                                                                                                                                                                                                                                                                                        |
| Others (30)        | desmedipham, 2-Pyrrolidinone, 2-N-heptylfuran, protocatechualdehyde, 3,4-Dihydroxybenzoic acid, N-(Phosphonomethyl)glycine 2-propylamine, benzothiazole, acrylamide, nerolidol, $\beta$ -estradiol, emodin, tanshinone IIA, methyl eugenol, isojasmone, alpha-bisabolol, trigonelline, methyl jasmonatepure, capsaicin, bis(2-ethylhexyl) phthalate, dibutyl phthalate, diallyl phthalate, diethyl phthalate, triphenyl phosphate, LSD, 3-Hydroxy-2-methyl-4H-pyran-4-one, quonestrol, betaine, nicotinamide, promethazine, L-carnitine |
